# Supplementary material for: ZnO/Ag nanohybrid: synthesis, characterization, synergistic antibacterial activity and its mechanism
Source: Royal Society of Chemistry journal article supplement (doi:10.1039/c1ra00815c), 2011-11-28
Supplement: c1ra00815c.pdf [file c1ra00815c.pdf]

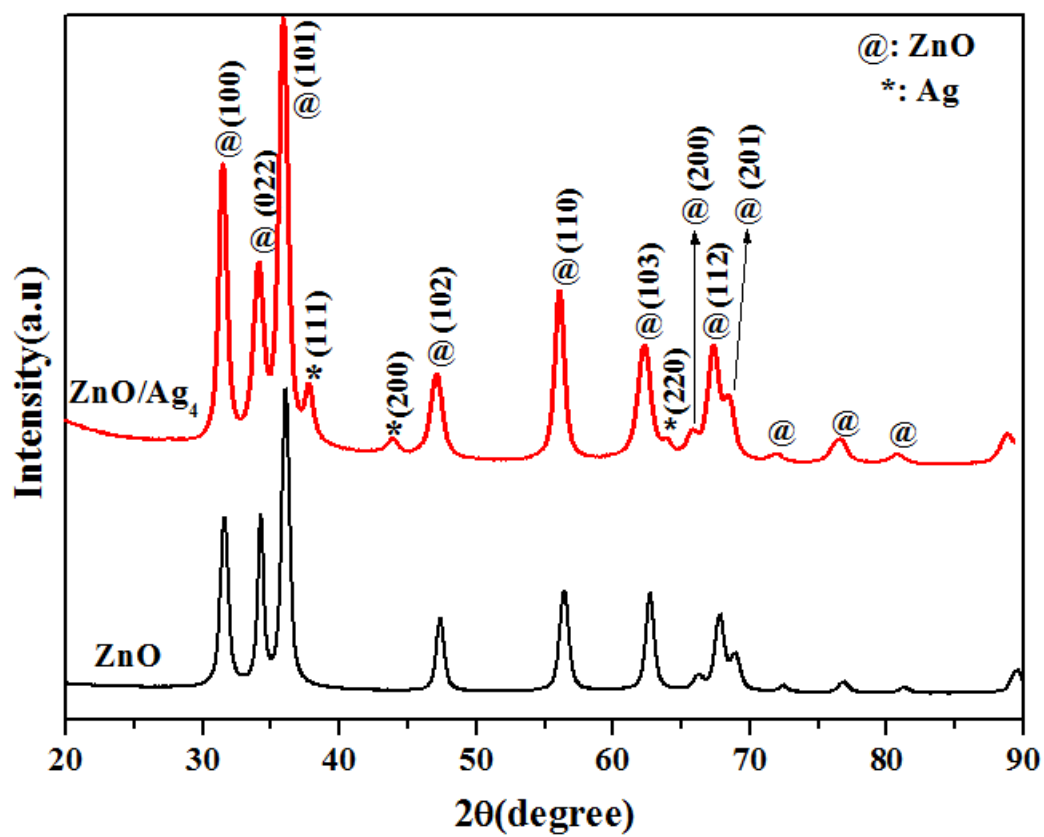

Fig. S1 Slow scan powder XRD pattern of ZnO and ZnO/Ag<sub>4</sub>.

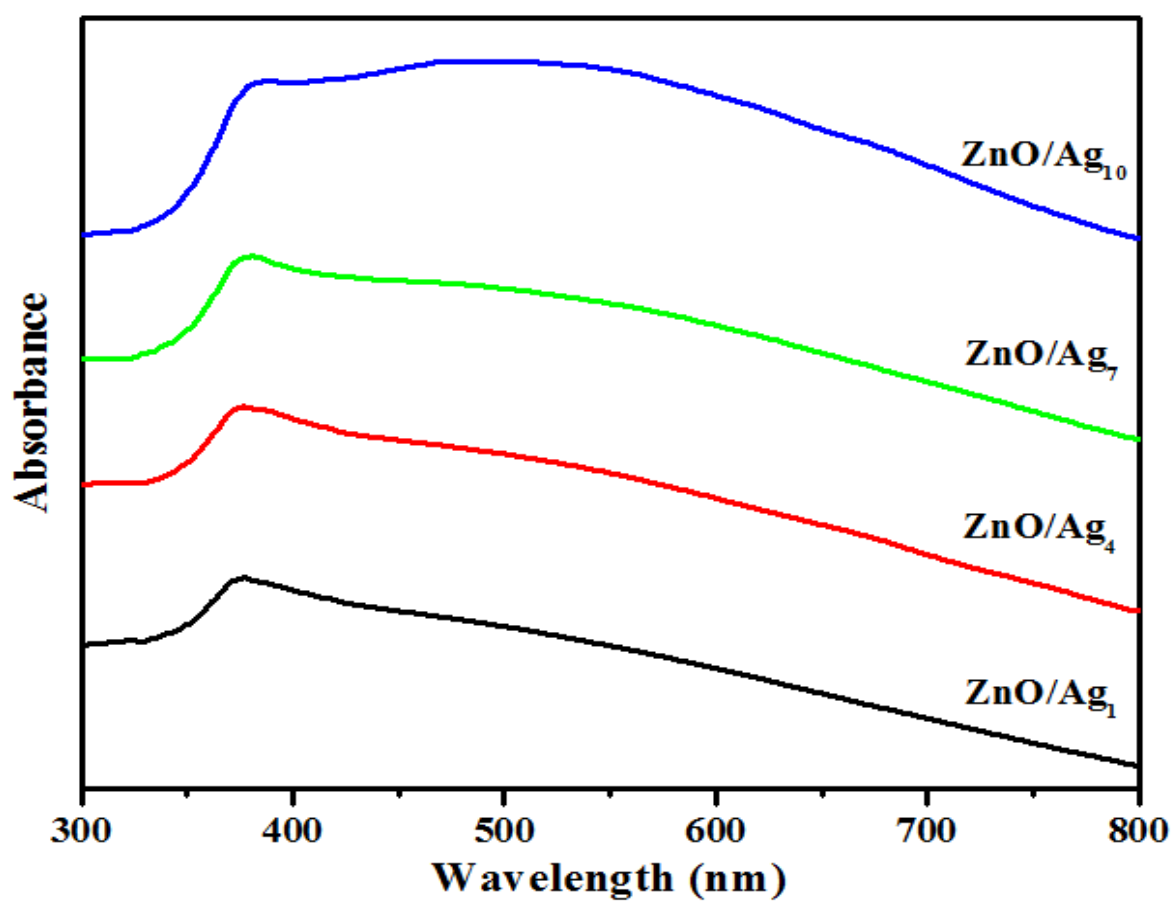

Fig. S2 UV-Visible spectra of ZnO/Ag<sub>1</sub>, ZnO/Ag<sub>4</sub>, ZnO/Ag<sub>7</sub> and ZnO/Ag<sub>10</sub>.
